# Supplementary material for: In situ measurements of trace gases, PM, and aerosol optical properties during the 2017 NW US wildfire smoke event
Source: Copernicus journal article supplement (doi:10.5194/acp-19-3905-2019), 2019-03-26
Supplement: Supplementary file 1 [file acp-19-3905-2019-supplement.zip]

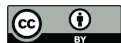

*Supplement of*

## **In situ measurements of trace gases, PM, and aerosol optical properties during the 2017 NW US wildfire smoke event**

**Vanessa Selimovic et al.**

*Correspondence to:* Robert J. Yokelson ([bob.yokelson@umontana.edu](mailto:bob.yokelson@umontana.edu))

- [acp-19-3905-2019-supplement-title-page.pdf](#)
- [acp-2018-1063-sup.xlsx](#)

The copyright of individual parts of the supplement might differ from the CC BY 4.0 License.
